# Supplementary material
Source: PubMed Central journal article supplement (PMC7339041)
Supplement: NIHMS1600945-supplement-ESMI_1.pdf [file NIHMS1600945-supplement-ESMI_1.pdf]

Online Resource 1. Consolidated criteria for reporting qualitative studies (COREQ): 32-item checklist

| Item Number                                    | Key Questions                                                         | Responses                                                                                                                                                                                                                                                                                             |
|------------------------------------------------|-----------------------------------------------------------------------|-------------------------------------------------------------------------------------------------------------------------------------------------------------------------------------------------------------------------------------------------------------------------------------------------------|
| <u>Domain 1: Research team and reflexivity</u> |                                                                       |                                                                                                                                                                                                                                                                                                       |
| Personal Characteristics                       |                                                                       |                                                                                                                                                                                                                                                                                                       |
| 1. Interviewer/facilitator                     | Which author(s) conducted the interview or focus group?               | Tatiana Requijo                                                                                                                                                                                                                                                                                       |
| 2. Credentials                                 | What were the researcher's credentials?                               | See Title page                                                                                                                                                                                                                                                                                        |
| 3. Occupation                                  | What was their occupation at the time of the study?                   | Medical student                                                                                                                                                                                                                                                                                       |
| 4. Gender                                      | Was the researcher male or female?                                    | Female                                                                                                                                                                                                                                                                                                |
| 5. Experience and training                     | What experience or training did the researcher have                   | The researcher was trained in qualitative methodologies using a pre-established training curriculum, mock interviews, and feedback sessions. She was also provide one-on-one feedback following each interview for the first five interviews to establish proper interviewing and probing techniques. |
| Relationship with participants                 |                                                                       |                                                                                                                                                                                                                                                                                                       |
| 6. Relationship established                    | Was a relationship established prior to study commencement?           | No                                                                                                                                                                                                                                                                                                    |
| 7. Participant knowledge of the interviewer    | What did the participants know about the researcher?                  | Participant information sheet and consent form                                                                                                                                                                                                                                                        |
| 8. Interviewer characteristics                 | What characteristics were reported about the interviewer/facilitator? | To minimize bias, no characteristics were provided                                                                                                                                                                                                                                                    |
| <u>Domain 2: Study design</u>                  |                                                                       |                                                                                                                                                                                                                                                                                                       |
| Theoretical framework                          |                                                                       |                                                                                                                                                                                                                                                                                                       |
| 9. Methodological orientation and theory       | What methodological orientation was started to underpin the study?    | See Methods                                                                                                                                                                                                                                                                                           |
| Participant selection                          |                                                                       |                                                                                                                                                                                                                                                                                                       |

|                                        |                                                                               |                  |
|----------------------------------------|-------------------------------------------------------------------------------|------------------|
| 10. Sampling                           | How were participants selected?                                               | See Methods      |
| 11. Method of approach                 | How were participants approached?                                             | See Methods      |
| 12. Sample size                        | How many participants were in the study?                                      | See Methods      |
| 13. Non-participation                  | How many people refused to participate or drop-out? Reasons?                  | See Methods      |
| Setting                                |                                                                               |                  |
| 14. Setting of data collection         | Where was the data collected?                                                 | See Methods      |
| 15. Presence of non-participants       | Was anyone else present besides the participants and researchers?             | No               |
| 16. Description of sample              | What are the important characteristics of the sample?                         | See Methods      |
| Data collection                        |                                                                               |                  |
| 17. Interview guide                    | Were questions, prompts, guides provided by the authors? Was it pilot tested? | Yes. See Methods |
| 18. Repeat interviews                  | Were repeat interviews carried out?                                           | No               |
| 19. Audio/visual recording             | Did the research use audio or visual recording to collect the data?           | Yes. See Methods |
| 20. Field notes                        | Were field notes made during and/or after the interviews?                     | Yes              |
| 21. Duration                           | What was the duration of the interviews?                                      | See Methods      |
| 22. Data saturation                    | Was data saturation discussed?                                                | Yes. See Methods |
| 23. Transcripts returned               | Were the transcripts returned to participants for comment and/or correction?  | No               |
| <u>Domain 3: analysis and findings</u> |                                                                               |                  |
| Data analysis                          |                                                                               |                  |
| 24. Number of data coders              | How many data coders coded the                                                | See Methods      |

|                                    |                                                                                                         |                     |
|------------------------------------|---------------------------------------------------------------------------------------------------------|---------------------|
|                                    | data?                                                                                                   |                     |
| 25. Description of the coding tree | Did authors provide a description of the coding tree?                                                   | Yes. See Methods    |
| 26. Derivation of themes           | Were themes identified in advance or derived from the data?                                             | See Methods         |
| 27. Software                       | What software, if applicable, was used to manage the data                                               | Microsoft Excel     |
| 28. Participant checking           | Did participants provide feedback on the findings?                                                      | No                  |
| Reporting                          |                                                                                                         |                     |
| 29. Quotations presented           | Were participant quotations presented to illustrate the themes/findings? Was each quotation identified? | Yes. See Results    |
| 30. Data and findings consistent   | Was there consistency between the data presented and the findings?                                      | Yes. See Discussion |
| 31. Clarify of major themes        | Were major themes clearly presented in the findings?                                                    | Yes. See Results    |
| 32. Clarify of minor themes        | Is there a description of diverse cases or discussion of minor themes?                                  | Yes. See Results    |
