# Supplementary material
Source: PubMed Central journal article supplement (PMC7339041)

**Online Resource 2. Reeve Conceptual Framework**

Re-published with permission, from: Reeve E, To J, Hendrix I, Shakib S, Roberts MS, Wiese MD. Patient barriers to and enablers of deprescribing: a systematic review. *Drugs Aging*. 2013;30(10):793-807. doi:10.1007/s40266-013-0106-8.

# WILLINGNESS TO DEPRESCRIBE

## BARRIERS

## ENABLERS

### Appropriateness of cessation

e.g. medication is necessary, hope for future benefit

e.g. lack of effectiveness, fear of side effects

### Fear

e.g. psychological issues related to cessation, fear of return of condition, fear of withdrawal effects

### Influences

e.g. physician, family, media, past experiences

### Dislike of medications

e.g. inconvenience (including cost), medications are unnatural

### Process of cessation

e.g. lack of GP support/time, unsure how to stop

e.g. can restart medication, support available

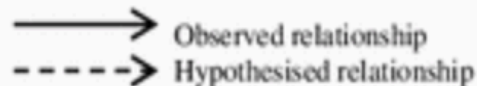

Supplement: NIHMS1600945-supplement-ESMI_2.pdf [file NIHMS1600945-supplement-ESMI_2.pdf]
