# Supplementary material
Source: PubMed Central journal article supplement (PMC7339041)
Supplement: NIHMS1600945-supplement-ESMI_3.pdf [file NIHMS1600945-supplement-ESMI_3.pdf]

### Online Resource 3. Interview Guide

1. “How would you feel if your doctor wanted to stop one of your heart medications?”

Probes:

Are there specific heart medications you would like to stop?

2. “In what situations might you be would **comfortable** if your doctor stopped one of your heart medications?”

Probes:

What if you had side effects?

What if your doctor told you that stopping a medication might help you feel better (for example, less fatigue)?

What if your doctor wanted to stop a heart medication to make it easier for you to manage your other medications?

What if stopping a medication reduced the overall cost of your medications?

3. “In what situations might you be **uncomfortable** if your doctor stopped one of your heart medications?”

Probes:

What if your doctor felt that the risks of a medication outweighed its possible benefits?

What difference would it make if your primary care doctor or a cardiologist suggested stopping one of your heart medications?

I’m going to pose a theoretical scenario: Would you be comfortable with your doctor stopping one of your heart medications if it helped you feel better in the short-term, but possibly shortened your life in the long-term?

4. “What would be important for you to know so you could discuss whether stopping your [insert name of beta-blocker] was right for you?”

Probes:

What potential benefits or potential risks would you be interested in knowing about?

5. “How would you feel if your doctor wanted to stop your [insert name of beta-blocker]?”

Probes:

What if your doctor wanted to **temporarily try** you off your [insert name of beta-blocker] to see if you did better without it?

What if your doctor told you that he/she wasn’t sure that being on [insert name of beta-blocker] was helpful to you?
